# Supplementary material for: Characterization of biofuel production from hydrothermal treatment of hyperaccumulator waste (Pteris vittata L.) in sub- and supercritical water
Source: Royal Society of Chemistry journal article supplement (doi:10.1039/c9ra09410e), 2020-01-01
Supplement: c9ra09410e1.pdf [file c9ra09410e1.pdf]

Characterization of biofuel production from hydrothermal treatment of  
hyperaccumulator waste (*Pteris vittata* L.) in sub- and supercritical water

Jinbo Chen\*<sup>†</sup>, Songmao Li<sup>†</sup>

Ningbo Institute of Materials Technology and Engineering, Chinese Academy of Sciences,  
Ningbo 315201, China.

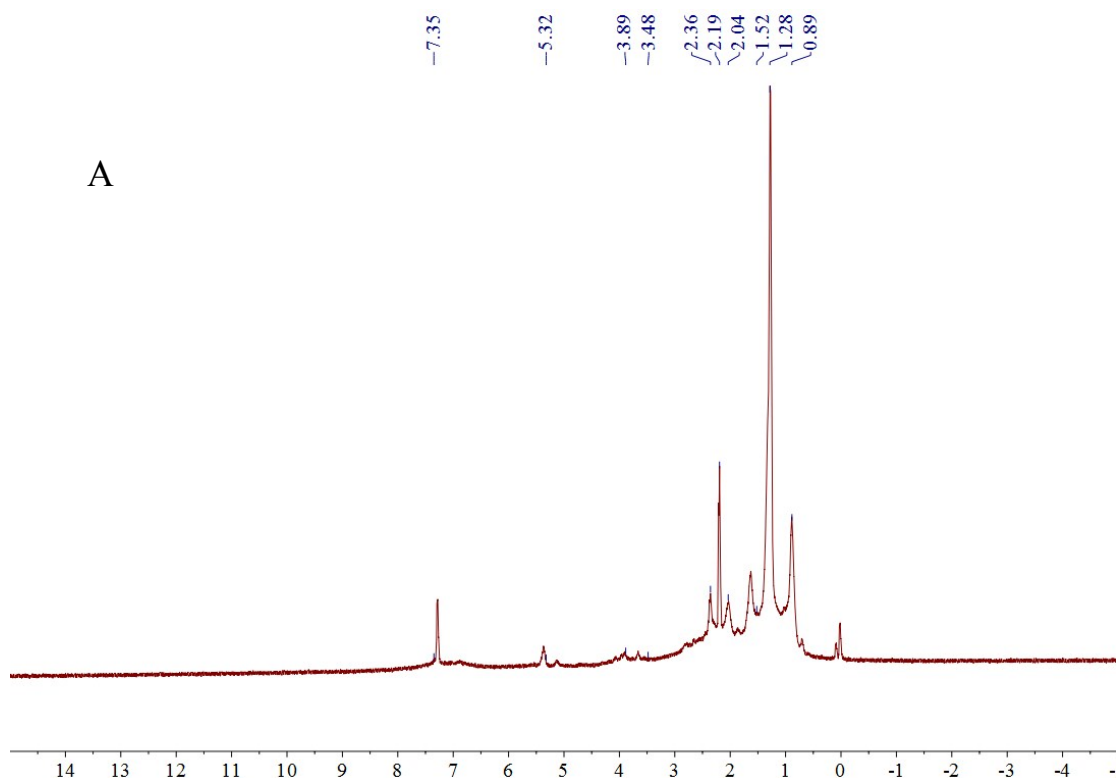

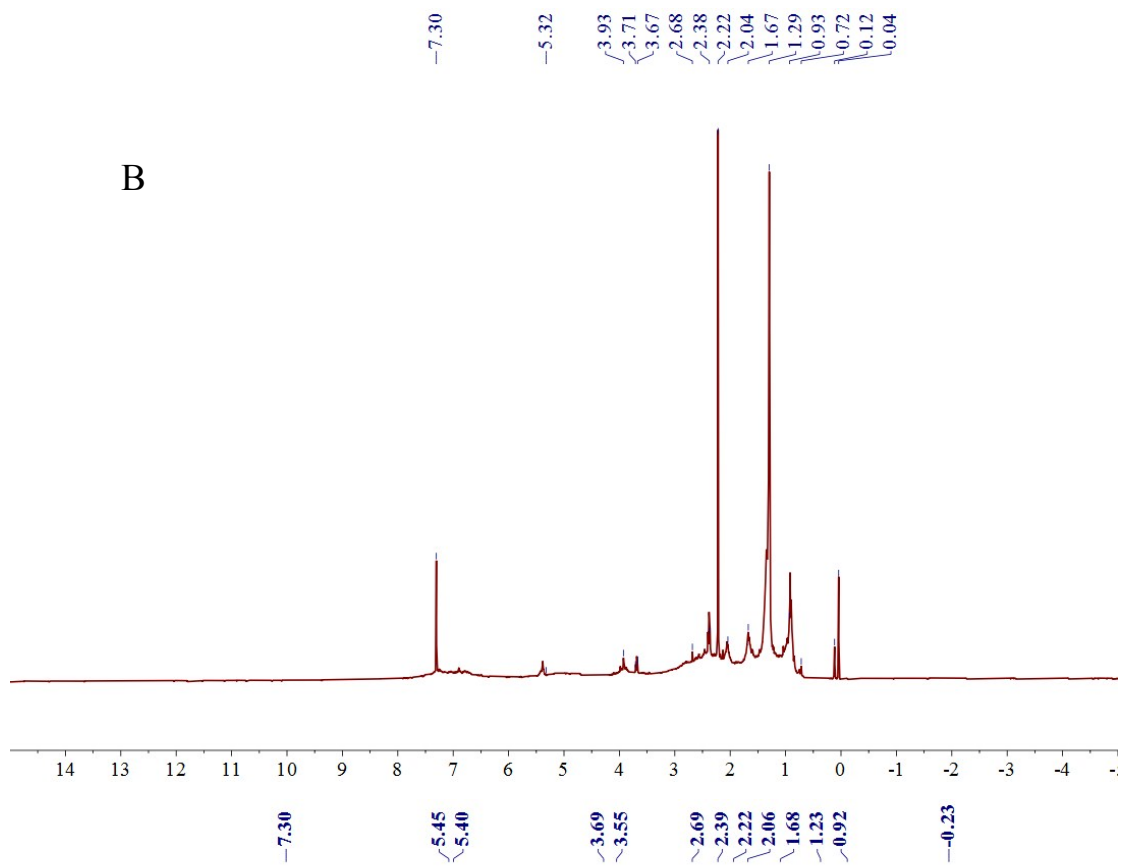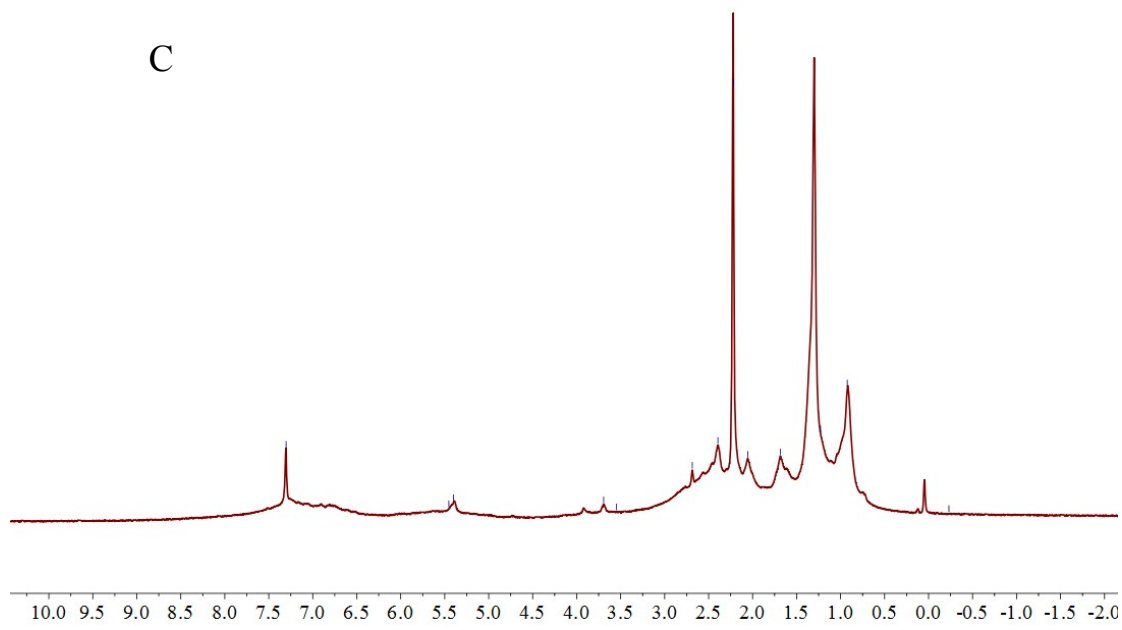

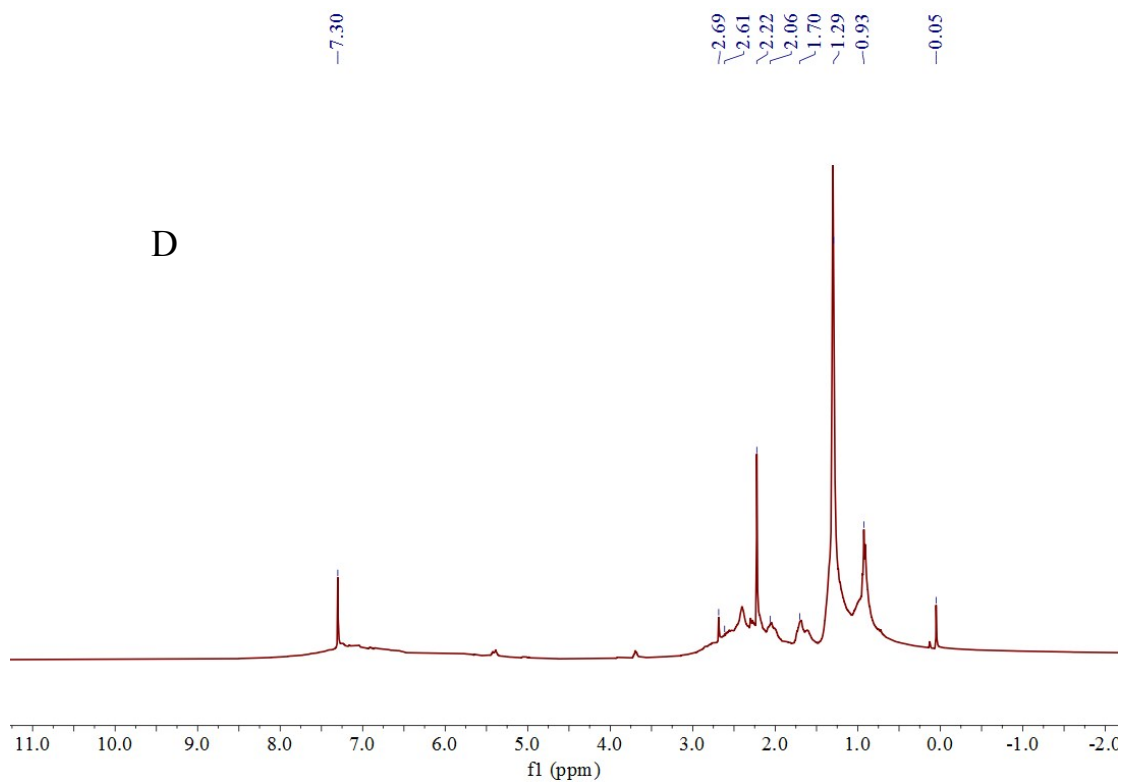

Figure S1.  $^1\text{H}$  NMR spectra of heavy bio-oils obtained from (A) 250 °C, (B) 300 °C, (C) 350 °C, (D) 390 °C.
